# Supplementary material
Source: publisher figshare collection journal article supplement (https://gsajournals.figshare.com/articles/dataset/_/7367141)
Supplement: Supplementary file 1 [file 1]

## Sheet: Fermentation
Fermentation Test	C. albicans*	NCYC 597	NCYC 4144	NCYC 4145	NCYC 4146
Glucose	+	+	+	+	+
Galactose	v	+	s	-	l	ç	Variation between oak strains
Sucrose	v	-	-		-
Maltose	+	+	+	+	+
Lactose	-	-	-	-	-
Trehalose	v	-	l	s/l	l
Melibiose		-	-	-	-
Cellobiose		-	-	-	-
Raffinose	-	-	-	-	-
Melizitose		-	-	-	-
Inulin		-	-	-	-
Sol. Starch		-	-	-	-
Xylose		-	-	-	-
Methyl-a-D-glucoside		-	-	-	-
Test results: +, positive; l, delayed positive; s, slow positive; w, weakly positve; -, negative; v, variable
* Species results according to Lachance et al. 2011 (In: The Yeasts, A Taxonomic Study, 5th Edition)

## Sheet: Assimilation
Assimilation Test	C. albicans*	NCYC 597	NCYC 4144	NCYC 4145	NCYC 4146
Glucose	+	+	+	+	+
Inulin	-	-	-	-	-
Sucrose	v	+	+	+	+
Raffinose	-	-	?	?	?
Melibiose	-	-	-	-	-
Galactose	+	+	+	+	+
Lactose	-	-	-	-	-
Trehalose	v	+	+	+	+
Maltose	+	+	+	+	+
Melezitose	v	-	l	l	w/s
Methyl-α-D-glucoside	v	+	+	+	+
Soluble starch	+	+	-	+	w/l	ç	Variation between oak strains
Cellobiose	-	-	-	-	-
Salicin	-	-	-	-	-
L-Sorbose	v	l	+	+	+
L-Rhamnose	-	-	-	-	-
D-Xylose	+	+	+	+	+
L-Arabinose	v	l	w	w/l	+
D-Arabinose	v	-	-	-	-
D-Ribose	v	-	-	-	-
Methanol	-	-	-	-	-
Ethanol	+	+	+	+	+
Glycerol	v	l	+	+	+
Erythritol	-	-	-	-	-
Ribitol	v	-	+	+	+	ç	Differ from type strain
Galactitol	-	-	-	-	-
D-Mannitol	+	+	+	+	+
D-Glucitol	v	+	+	+	+
Inositol	-	-	-	-	-
DL-Lactate	+	+	+	+	+
Succinate	+	+	+	+	+
Citrate	+	+	+	+	+
D-Glucosamine	v	l	-	-	-
Nitrate	-	-	-	-	-
Xylitol	v	+	+	+	+

## Sheet: Other
Additional Test	C. albicans*	NCYC 597	NCYC 4144	NCYC 4145	NCYC 4146
L-Lysine	+	+	+	+	+
Cadaverine	+	+	+	+	+
Ethylamine	+	+	+	+	+
Cycloheximide 0.1%	+	+	w	+	+
NaCl (10%)	v	?	-	+	+	ç	Variation between oak strains
NaCl (16%)		?	-	w	-
Glucose (50%)	v	-	+	+	+	ç	Differ from type strain
Glucose (60%)		-	+	+	+
Starch formation	-	-	?	?	?
Lipolytic	s	?	-	-	-
Urease		-	-	-	-
Growth at 25˚C	+	+	+	+	+
Growth at 30˚C	+	+	+	+	+
Growth at 37˚C	+	+	+	+	+
Growth at 40˚C		+	+	+	+
Growth at 42°C		?	+	+	+
